# Supplementary material
Source: PubMed Central journal article supplement (PMC5083083)
Supplement: 10.1074_M116.058966_mcp.M116.058966-1.pdf [file 10.1074_M116.058966_mcp.M116.058966-1.pdf]

## Supplemental Data

**Supplemental Fig 1:** Time course of mechanical allodynia induced by SNI. The graph depicts the average withdrawal latencies to innocuous mechanical stimulation at the indicated time points. Significant mechanical allodynia is only observed in SNI-treated animals (compared to Sham-surgery; \*\*\*P < 0.001 and \*\*P < 0.01 by two-way ANOVA followed by Bonferroni's multiple comparison test; pre: 20 animals per condition; week1: 13 animals per condition; week2 and week3: 8 animals per condition; week4: 24 animals per condition; from > 5 independent mouse cohorts)

**Supplemental Fig. 2.** Composition of the DRG-specific spectral library as revealed by Gene ontology (GO)-based analysis in respect to GO Cellular Component and GO Molecular Function.

**Supplemental Fig 3:** (A) Schematic representation of the block randomization during the spectral acquisition of all the 12 HRM runs. (B) Total ion chromatograms during HRM acquisition for the four samples integrating the second block replicate

**Supplemental Fig 4:** Box plot visualization before and after normalization. Globally, little normalization was needed due to the similarity of the samples in protein content and concentration.

**Supplemental Fig 5:** Coefficient of variation of the quantified signals for all 4 experimental conditions.

**Supplemental Fig 6:** Assigned Gene Ontology (GO) molecular function (MF) categories and the relative abundance of significantly regulated proteins during inflammatory (left) and neuropathic (right) pain.

**Supplemental Fig. 7:** Images of full blots. Left, full blot of data shown in Fig. 3A. For humane reasons (reduction of animals needed for this study) we cut Western blots in 4 pieces to enable individual probing with different antibodies (also including those which are not related to the current study labeled in smaller, regular font in the blot). Serca probing was performed on both upper halves of the blot after incubation of blots with Grp94 and NF160. The band corresponding to Serca on both upper halves is indicated by the arrow. Actin ( $\beta$ -Actin) probing was performed on both lower halves after incubation of blots with PDIA6 (left lower half), CNPase (right lower half) and Peripherin (both lower halves). The order of probing was carefully determined in previous experiments considering the molecular weight of each protein and the species primary antibodies were derived from. Right, in order to demonstrate the specificity of Serca and Actin bands, we show on the right the same blot as left but after initial incubation with antibodies against Grp94 (upper halves), PDIA6 (left lower half) or CNPase (right lower half) and before incubation with the antibody against Serca.

**Supplemental Fig. 8:** Upregulation of Serca expression in axons of sciatic nerves during inflammatory pain. (A, B) Representative cross sections of big fascicles of sciatic nerves derived from Veh-treated (A) and CFA-treated (B) animals stained for Serca and Tubulin III (a neuronal marker, left panels) or Serca, Peripherin (a marker for unmyelinated C-fibers) and Fluoromyelin (to visualize myelin) in right panels. The merged images of both conditions show prominent colocalization of Serca and Tubulin III (left panels) as well as Serca and Peripherin (right panels) suggesting neuronal expression of Serca in unmyelinated C-fibers within Remak bundles. Note that Serca-label is clearly segregated from Fluoromyelin-positive, i.e. myelinated axons. (C, D) Representative longitudinal sections of big fascicles of sciatic nerves derived from Veh-treated (C) and CFA-treated (D) animals stained for Tubulin III (a neuronal marker) or Fluoromyelin (to visualize myelin) and Serca. In both conditions the majority of Serca-label colocalizes with Tubulin III-positive nerve fibers suggesting neuronal expression of Serca. Note that Serca-label does not overlap with Fluoromyelin, instead Serca-label is found juxtaposed to Fluoromyelin. Asterisks indicate apparent Serca-label in blood vessels.

Scale bars: 10  $\mu\text{m}$

**Supplemental Table 1:** Mouse DRG spectral library (“Spectral library” tab) containing information for 161605 peptides corresponding to 3067 proteins. Column legends are explained in the “Legend” tab.

**Supplemental Table 2:** List of ion channels and receptors present in the spectral library and previously shown to be involved in somatosensation and pain.

**Supplemental Table 3:** Statistical analysis of proteins profiled in this study in both inflammatory (“comparison CFA versus Vehicle” tab) and neuropathic (“comparison SNI versus Sham” tab) pain conditions. Column legends are explained in the “Legend” tab.

**Supplemental Table 4:** Overlapping proteins identified in both, inflammatory and neuropathic pain conditions. Differentially regulated proteins are highlighted in orange color.

# Supplementary Figure 1

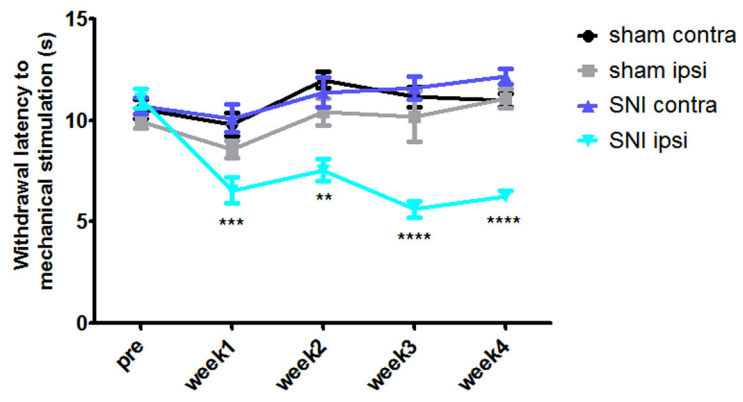

# Supplemental Figure 2

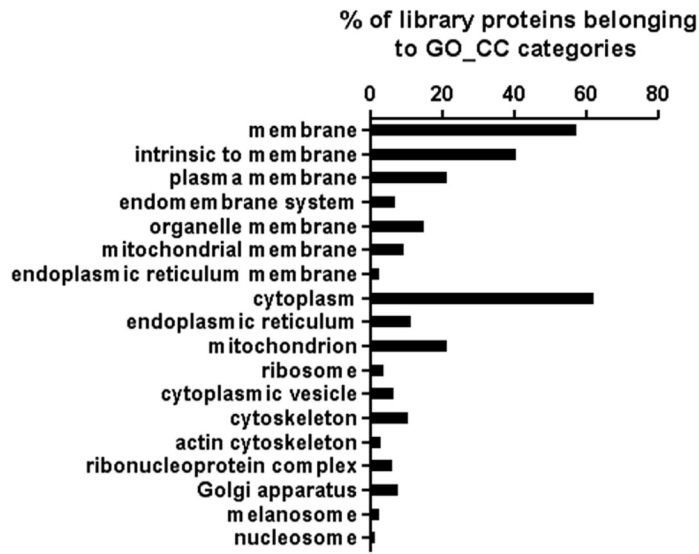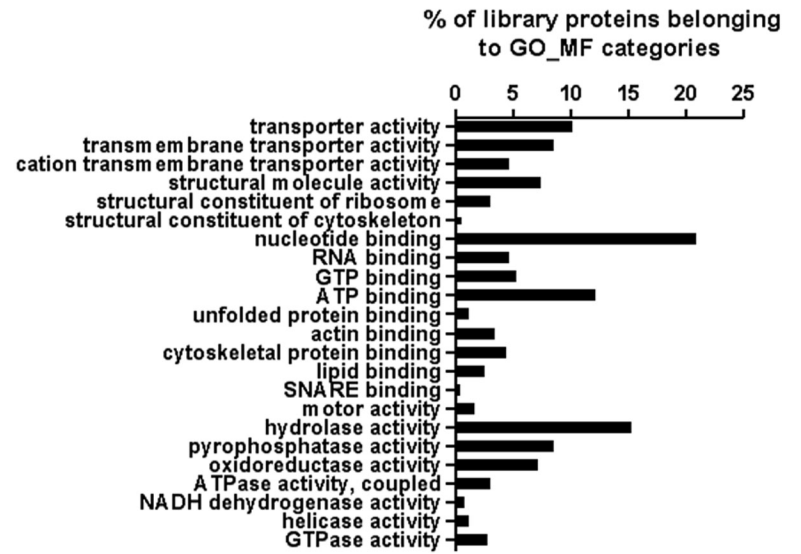



# Supplemental Figure 3

**a**

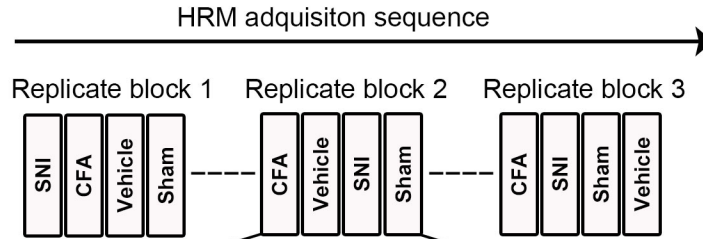

**b**

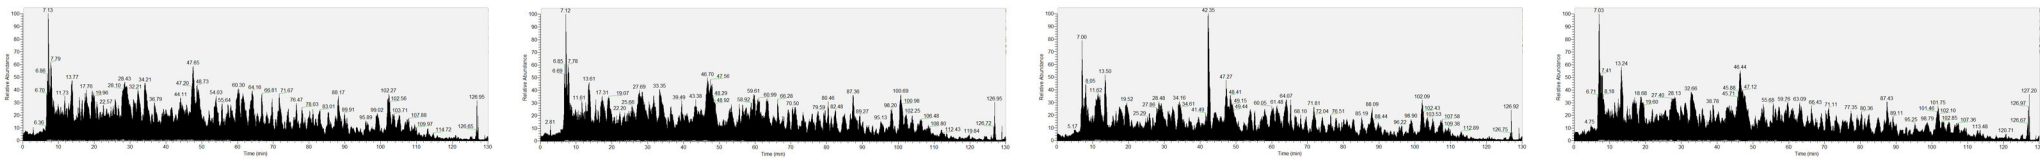

Supplemental Figure 4

Before Normalization

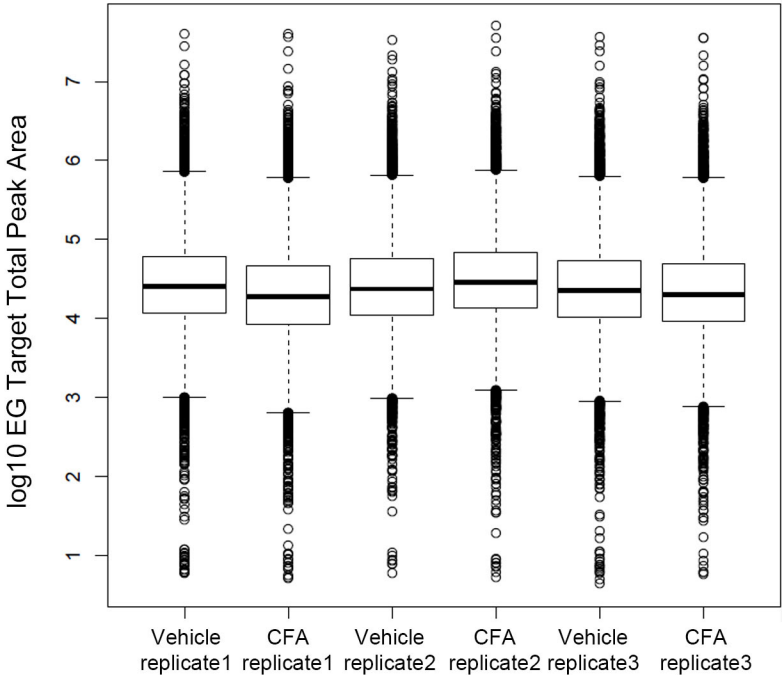

After Normalization

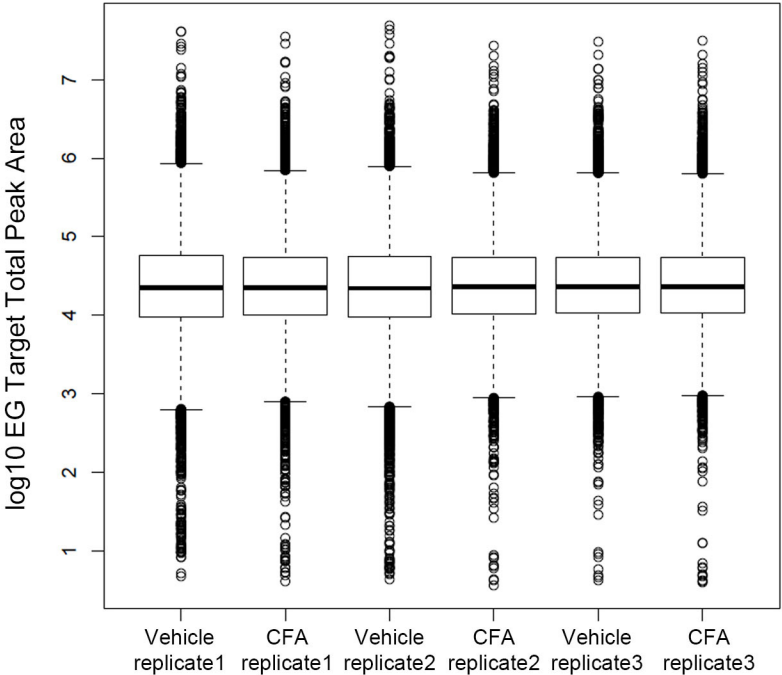

## Supplemental Figure 5

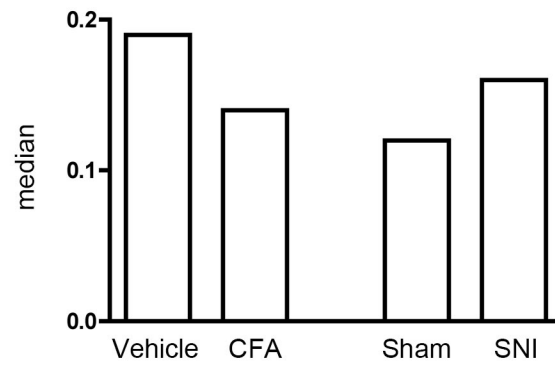

# Supplemental Figure 6

## Inflammatory

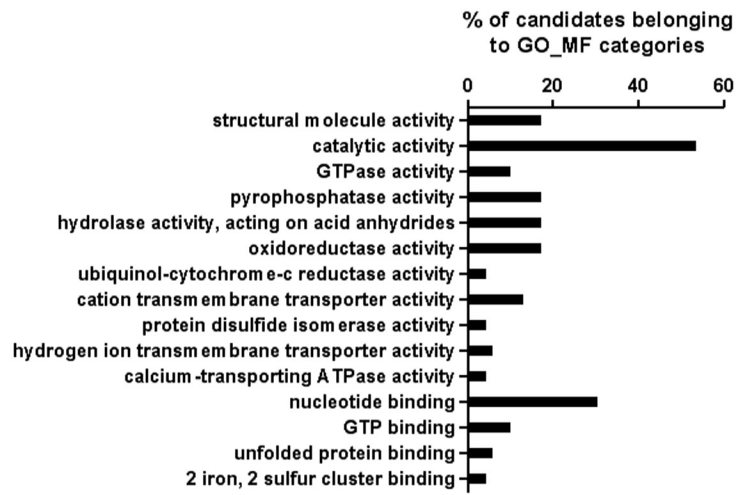

## Neuropathic

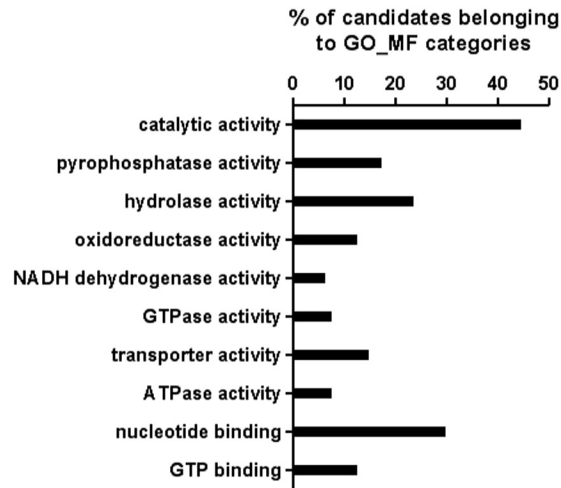

# Supplementary Figure 7

Original blot from Figure 4

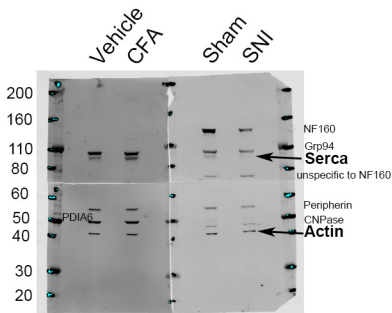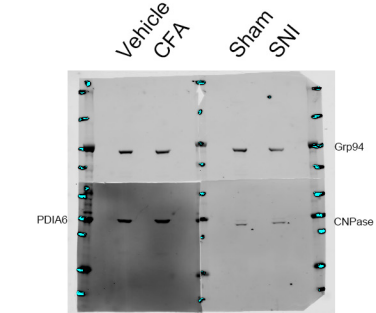

same blot as left after initial incubation with antibodies against Grp94 (upper halves) and PDIA6 (left lower half) or CNPase (right lower half)

# Supplemental Figure 8

**A**

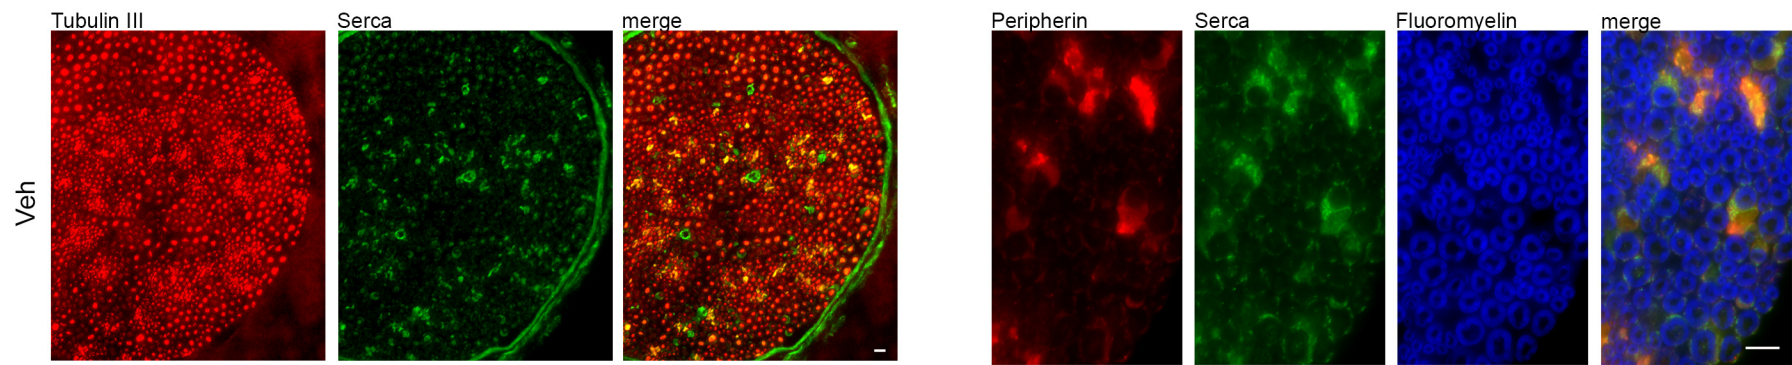

**B**

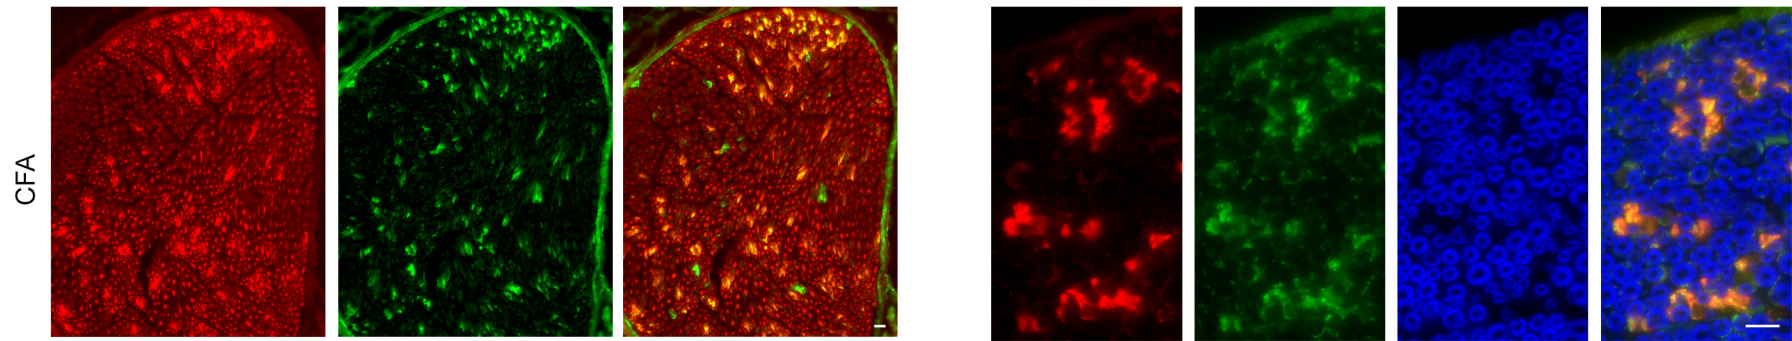

**C**

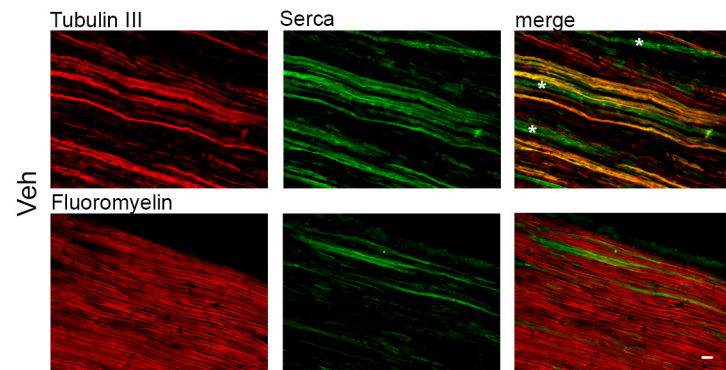

**D**

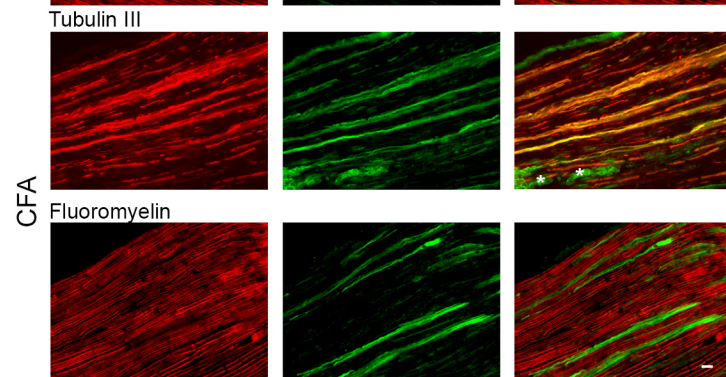

| UniProt ID | Protein ID      | Full name                                                               |
|------------|-----------------|-------------------------------------------------------------------------|
| Q8BLA8     | TRPA1           | Transient receptor potential ion channel A1                             |
| Q9QZC1     | TRPC3           | Transient receptor potential ion channel C3                             |
| Q704Y3     | TRPV1           | Transient receptor potential ion channel V1                             |
| Q9WTR1     | TRPV2           | Transient receptor potential ion channel V2                             |
| Q6QIY3     | Nav 1.8, Scn10a | Sodium channel, voltage-gated, type 10, subunit alpha                   |
| Q9R053     | Nav 1.9, Scn11a | Sodium channel, voltage-gated, type 11, subunit alpha                   |
| O08532     | Cacna2d1        | calcium channel, voltage-dependent, alpha2/delta subunit 1              |
| O55017     | Cacna1b         | calcium channel, voltage-dependent, N type, alpha 1B subunit, Cav2.2    |
| P97445     | Cacna1a         | calcium channel, voltage-dependent, P/Q type, alpha 1A subunit, Cav 2.1 |
| P48302     | Ednrb           | endothelin receptor type B                                              |
| Q9WV18     | Gabbr1          | gamma-aminobutyric acid (GABA) B receptor, 1                            |
| Q60934     | Grik1           | glutamate receptor, ionotropic, kainate 1; GluR5                        |
| Q6ZPR4     | Kcnt1           | potassium channel, subfamily T, member 1                                |
| Q9JM63     | Kcnj10          | potassium inwardly-rectifying channel, subfamily J, member 10           |
| Q03717     | Kcnb1           | potassium voltage gated channel, Shab-related subfamily, member 1       |
| A6H8H5     | Kcnb2           | potassium voltage gated channel, Shab-related subfamily, member 2       |
| P16388     | Kcna1           | potassium voltage-gated channel, shaker-related subfamily, member 1     |
| P63141     | Kcna2           | potassium voltage-gated channel, shaker-related subfamily, member 2     |
| Q9JJX6     | P2rx4           | purinergic receptor P2X, ligand-gated ion channel 4                     |
| Q3UR32     | P2rx3           | purinergic receptor P2X, ligand-gated ion channel, 3                    |
| Q9Z1M0     | P2rx7           | purinergic receptor P2X, ligand-gated ion channel, 7                    |
| Q8CD54     | Piezo2          | Piezo-Type Mechanosensitive Ion Channel Component 2                     |
| P70263     | Ptgdr           | prostaglandin D receptor                                                |
| Q01279     | Egfr            | epidermal growth factor receptor                                        |
| Q9Z0W1     | Ngfr            | nerve growth factor receptor                                            |
| Q99MB1     | Tlr3            | toll-like receptor 3                                                    |
| P97785     | Gfra1           | glial cell line derived neurotrophic factor family receptor alpha 1     |
| P05622     | Pdgfrb          | platelet derived growth factor receptor, beta polypeptide               |

**Supplemental Table 2:** List of ion channels and receptors present in the spectral library and previously shown to be involved in somatosensation and pain.
